# Supplementary material for: An Intrinsic Evaluator for Embedding Methods in Malicious URL Detection
Source: Research Square preprint supplement (doi:10.21203/rs.3.rs-4109219/v1), 2024-03-19
Supplement: Supplementary file 1 [file f4f98b8132a0008a6e70b7db.pdf]

## Availability of data and materials

The corpus of URL is crawled from AlexaTop [//https://www.alexa.com/topsites](https://www.alexa.com/topsites), which stopped service in 2022, but we still can obtain the last version of the site rank. Uploaded as BenignURL.csv.

The URLhaus database [//https://urlhaus.abuse.ch/](https://urlhaus.abuse.ch/) provides malicious URLs. Uploaded as MaliciousURL.csv.
